# Supplementary material for: A new three-dimensional zinc(ii) metal–organic framework as a fluorescence sensor for sensing the biomarker 3-nitrotyrosine
Source: Royal Society of Chemistry journal article supplement (doi:10.1039/d2dt01800d), 2022-01-01
Supplement: d2dt01800d1.pdf [file d2dt01800d1.pdf]

# A New Three-Dimensional Zinc(II) Metal-Organic Framework as a Fluorescent Sensor for Sensing Biomarker 3-Nitrotyrosine

Jun Geng, Yuyao Li, Hongyan Lin, Qianqian Liu, Junjun Lu and Xiuli Wang\*

*College of Chemistry and Materials Engineering, Professional Technology  
Innovation Center of Liaoning Province for Conversion Materials of Solar Cell,  
Bohai University, Jinzhou 121013, P. R. China*

## Section 1 Experimental

### I. Materials and general methods

The ligand L was prepared according to the synthesis method of the literature.<sup>1</sup> The reagents and solvents used in the experiments were purchased from commercial sources and used without further purification. The single X-ray diffraction data for Zn-MOF was collected by using a Bruker SMART APEX II CCD diffractometer at 273 K with Mo K $\alpha$  radiation ( $\lambda = 0.71073 \text{ \AA}$ ). The infrared (IR) spectra data were gathered on a Varian640 FTIR spectrometer through KBr pellet from 500 cm<sup>-1</sup> to 4000 cm<sup>-1</sup> region, and the powder X-ray diffraction (PXRD) patterns were collected on a D/teX Ultra diffractometer. The thermal stabilities of Zn-MOF were analyzed with a thermogravimetric analyzer (NETZSCH STA 449C). The fluorescent spectra were recorded on a Hitachi F-4500 luminescence/phosphorescence spectrometer. Fluorescence lifetime and quantum yield data were obtained on the FLS1000 transient steady-state fluorescence spectrometer. UV-vis absorption spectra were carried out on SP-1900. The PHS-3C-meter with an E-201-C glass electrode was used to determine the pH of the solution.

### II. X-ray crystallography.

Data collection was performed on a Bruker Smart APEX II diffractometer with K $\alpha$  ( $\lambda = 0.71073 \text{ \AA}$ ) by  $\theta$  and  $\omega$  scan mode at room temperature. The crystal structure was solved by direct method using the SHELXT program of the Olex 2 crystallographic software package and refined on  $F^2$  by full-matrix least-squares methods.<sup>2</sup> Anisotropic thermal parameters were utilized in all non-hydrogen atoms. Crystal data and structural refinements were displayed in Table S1. CCDC number is 1992602. Selected bond

lengths and angles were shown in Table S2 for Zn-MOF.

**Table S1.** Crystallographic data for Zn-MOF.

| Complex                                                                                                                                                                                                                                                                                                                                                     | Zn-MOF                                                           |
|-------------------------------------------------------------------------------------------------------------------------------------------------------------------------------------------------------------------------------------------------------------------------------------------------------------------------------------------------------------|------------------------------------------------------------------|
| Empirical formula                                                                                                                                                                                                                                                                                                                                           | C <sub>35</sub> H <sub>24</sub> N <sub>4</sub> O <sub>8</sub> Zn |
| Formula weight                                                                                                                                                                                                                                                                                                                                              | 693.95                                                           |
| Temperature/K                                                                                                                                                                                                                                                                                                                                               | 273.15                                                           |
| Crystal system                                                                                                                                                                                                                                                                                                                                              | Monoclinic                                                       |
| Space group                                                                                                                                                                                                                                                                                                                                                 | <i>P</i> 2 <sub>1</sub> /n                                       |
| <i>a</i> (Å)                                                                                                                                                                                                                                                                                                                                                | 10.643(4)                                                        |
| <i>b</i> (Å)                                                                                                                                                                                                                                                                                                                                                | 26.202(9)                                                        |
| <i>c</i> (Å)                                                                                                                                                                                                                                                                                                                                                | 10.933(4)                                                        |
| $\alpha$ (°)                                                                                                                                                                                                                                                                                                                                                | 90                                                               |
| $\beta$ (°)                                                                                                                                                                                                                                                                                                                                                 | 94.503(7)                                                        |
| $\gamma$ (°)                                                                                                                                                                                                                                                                                                                                                | 90                                                               |
| <i>V</i> (Å <sup>3</sup> )                                                                                                                                                                                                                                                                                                                                  | 3039.6(18)                                                       |
| <i>Z</i>                                                                                                                                                                                                                                                                                                                                                    | 4                                                                |
| <i>D<sub>c</sub></i> (g cm <sup>-3</sup> )                                                                                                                                                                                                                                                                                                                  | 1.516                                                            |
| $\mu$ (mm <sup>-1</sup> )                                                                                                                                                                                                                                                                                                                                   | 0.871                                                            |
| <i>F</i> (000)                                                                                                                                                                                                                                                                                                                                              | 1424.0                                                           |
| Reflections collected                                                                                                                                                                                                                                                                                                                                       | 17273                                                            |
| Data/restraints/parameters                                                                                                                                                                                                                                                                                                                                  | 5327/234/490                                                     |
| Goodness-of-fit on <i>F</i> <sup>2</sup>                                                                                                                                                                                                                                                                                                                    | 1.009                                                            |
| Final <i>R</i> indexes [ <i>I</i> >= 2σ ( <i>I</i> )]                                                                                                                                                                                                                                                                                                       | <i>R</i> <sub>1</sub> = 0.0581, <i>wR</i> <sub>2</sub> = 0.1397  |
| Final <i>R</i> indexes [all data]                                                                                                                                                                                                                                                                                                                           | <i>R</i> <sub>1</sub> = 0.1209, <i>wR</i> <sub>2</sub> = 0.1688  |
| <sup>a</sup> <i>R</i> <sub>1</sub> = Σ   <i>F</i> <sub>o</sub>   -   <i>F</i> <sub>c</sub>    / Σ  <i>F</i> <sub>o</sub>  , <sup>b</sup> <i>wR</i> <sub>2</sub> = Σ[ <i>w</i> ( <i>F</i> <sub>o</sub> <sup>2</sup> - <i>F</i> <sub>c</sub> <sup>2</sup> ) <sup>2</sup> ] / Σ[ <i>w</i> ( <i>F</i> <sub>o</sub> <sup>2</sup> ) <sup>2</sup> ] <sup>1/2</sup> |                                                                  |

**Table S2.** Selected bond distances (Å) and angles (°) for Zn-MOF.

| Zn-MOF                                                           |            |                    |            |
|------------------------------------------------------------------|------------|--------------------|------------|
| Zn(1)-O(2)#1                                                     | 1.955(4)   | O(6)-Zn(1)-O(2)#1  | 121.7(3)   |
| Zn(1)-O(6)                                                       | 1.942(7)   | O(6)-Zn(1)-N(2)    | 99.4(5)    |
| Zn(1)-N(2)                                                       | 2.034(4)   | O(6)-Zn(1)-N(3)#2  | 102.9(5)   |
| Zn(1)-N(3)#2                                                     | 2.058(4)   | N(2)-Zn(1)-N(3)#2  | 116.62(18) |
| Zn(1)-O(6)A                                                      | 1.948(6)   | O(6)A-Zn(1)-N(2)   | 108.1(5)   |
| O(2)#1-Zn(1)-N(2)                                                | 110.56(16) | O(6)A-Zn(1)-N(3)#2 | 95.3(5)    |
| O(2)#1-Zn(1)-N(3)#2                                              | 106.10(17) |                    |            |
| Symmetry code: #1 -1/2+X, 1/2-Y, -1/2+Z; #2 -1/2+X, 3/2-Y, 1/2+Z |            |                    |            |

## Section 2 Results Discussion Section

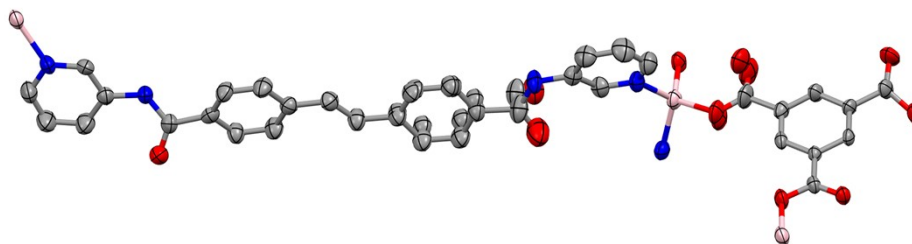

Fig. S1 ORTEP diagram of Zn-MOF at the 50% probability level.

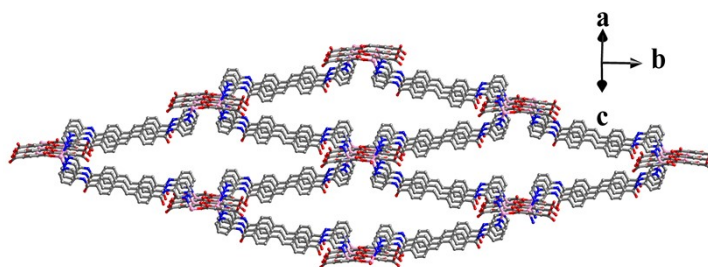

Fig. S2 View of the 3D framework of Zn-MOF.

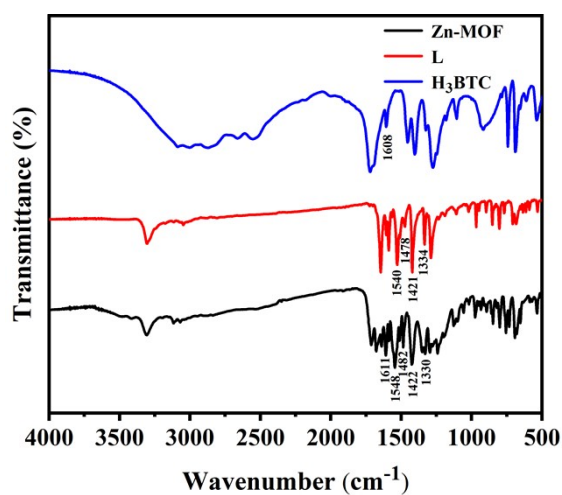

Fig. S3 FT-IR spectra of Zn-MOF and ligands.

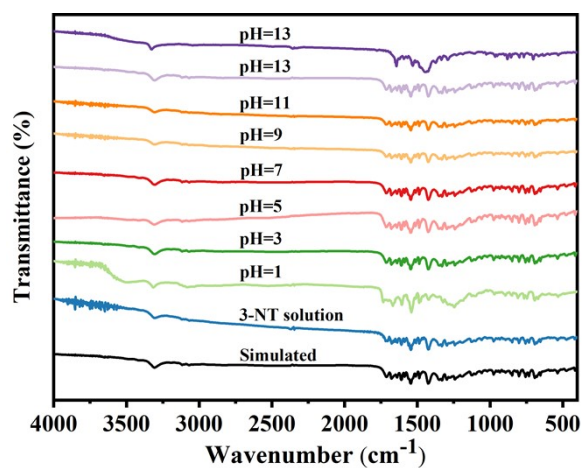

Fig. S4 FT-IR spectra of Zn-MOF in the different pH and after detecting 3-NT.

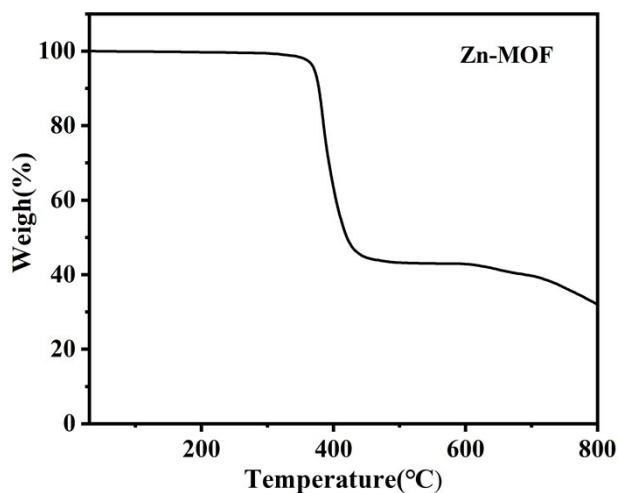

**Fig. S5** The TG curve of Zn-MOF.

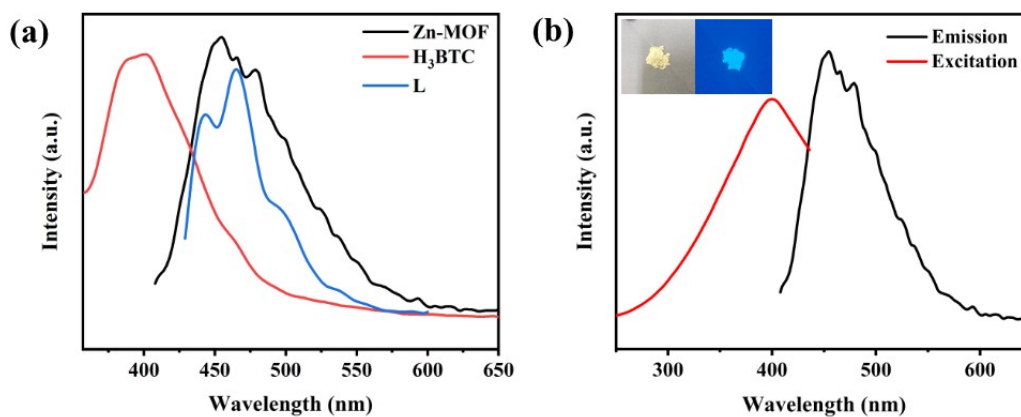

**Fig. S6** (a) The emission spectra of solid-state Zn-MOF, L and H<sub>3</sub>BTC; (b) The solid excitation and emission spectra of Zn-MOF.

**Table S3** Comparison of various methods for 3-NT detection.

| Methods                            | LOD (mol/L)            | References                         |
|------------------------------------|------------------------|------------------------------------|
| LC-MS/MS                           | $1.70 \times 10^{-11}$ | Göen et al. (2005) <sup>3</sup>    |
| SPE <sup>a</sup> – HPLC            | $3.10 \times 10^{-6}$  | Mergola et al. (2013) <sup>4</sup> |
| Real time-tandem mass spectrometry | $8.80 \times 10^{-7}$  | Song et al. (2015) <sup>5</sup>    |
| HPLC                               | $2.30 \times 10^{-8}$  | Monica et al. (2017) <sup>6</sup>  |
| Surface plasmon resonance          | $5.30 \times 10^{-10}$ | He et al. (2019) <sup>7</sup>      |
| Molecular Imprinting               | $2.23 \times 10^{-8}$  | Martins et al. (2020) <sup>8</sup> |
| Electrochemiluminescence           | $8.40 \times 10^{-9}$  | Zhu et al. (2021) <sup>9</sup>     |
| Fluorescence                       | $3.10 \times 10^{-7}$  | Present work                       |

<sup>a</sup> Solid-phase extraction.

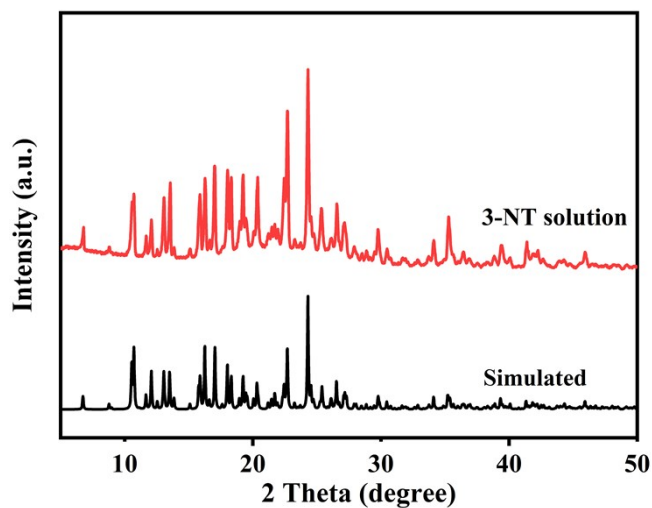

**Fig S7.** The PXR D pattern of Zn-MOF after detecting 3-NT.

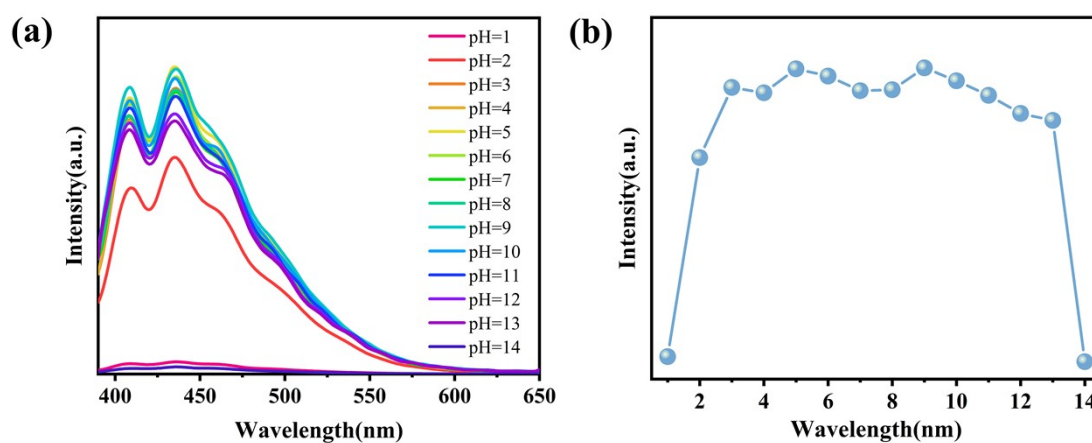

**Fig. S8** (a) Emission spectra and intensities of Zn-MOF suspensions in different pH values; (b) Emission intensity line chart of Zn-MOF suspensions in different pH values.

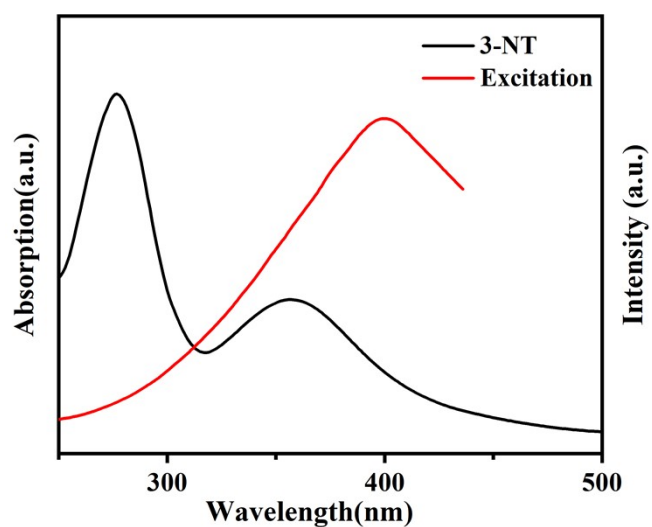

**Fig. S9** The UV-vis absorption spectra of 3-NT and excitation spectra of Zn-MOF.

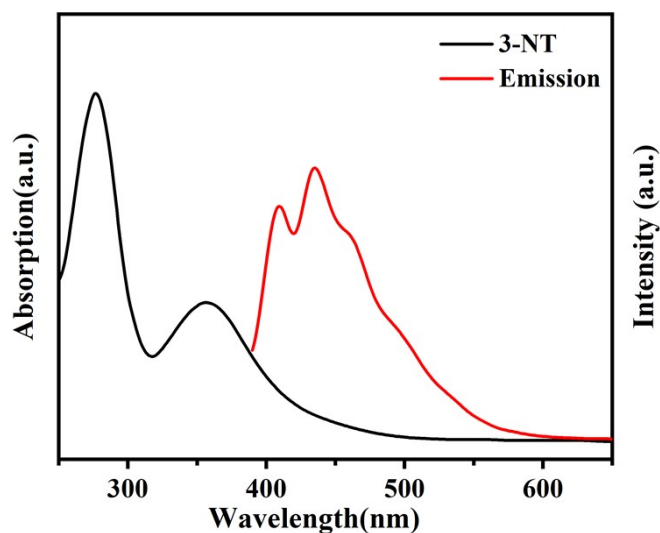

**Fig. S10** The UV-vis absorption spectra of 3-NT and emission spectra of Zn-MOF.

**Table S4.** HOMO and LUMO energies calculated for ligand L and analyte at B3LYP/6-31G(d).

|      | HOMO (eV) | LUMO (eV) | Band Gap (eV) |
|------|-----------|-----------|---------------|
| L    | -6.1293   | -2.2503   | 3.8790        |
| 3-NT | -6.5713   | -2.7987   | 3.7726        |

## References

1. Y. F. Hsu, C. H. Lin, J. D. Chen and J. C. Wang, *Cryst. Growth Des.*, 2008, **8**, 2047-2047.
2. G. Sheldrick, *Acta Crystallogr A*, 2008, **64**, 112-122.
3. T. Gönen, A. Müller-Lux, P. Dewes, A. Musiol and T. Kraus, *J. Chromatogr. B*, 2005, **826**, 261-266.
4. L. Mergola, S. Scorrano, R. Del Sole, M. R. Lazzoi and G. Vasapollo, *Biosens. Bioelectron.*, 2013, **40**, 336-341.
5. Y. Song, J. Liao, C. Zha, B. Wang and C. C. Liu, *Acta Pharm Sin B*, 2015, **5**, 482-486.
6. D. Teixeira, C. Prudencio and M. Vieira, *J. Chromatogr. B Anal. Technol. Biomed. Life Sci.*, 2017, **1046**, 48-57.
7. Q. He, Y. Chen, D. Shen, X. Cui, C. Zhang, H. Yang, W. Zhong, S. A. Eremin, Y. Fang and S. Zhao, *Talanta*, 2019, **195**, 655-661.
8. G. V. Martins, A. C. Marques, E. Fortunato and M. G. F. Sales, *Sensing and Bio-Sensing Research*, 2020, **28**.
9. L. Zhu, S. Li, W. Liu, J. Chen, Q. Yu, Z. Zhang, Y. Li, J. Liu and X. Chen, *Biosens. Bioelectron.*, 2021, **187**, 113284.
